# Supplementary figures and images for: A New Species of the Pythonomorph Carentonosaurus from the Cenomanian of Algora (Guadalajara, Central Spain)
Source: MDPI journal article supplement (doi:10.3390/ani13071197), 2023-03-29

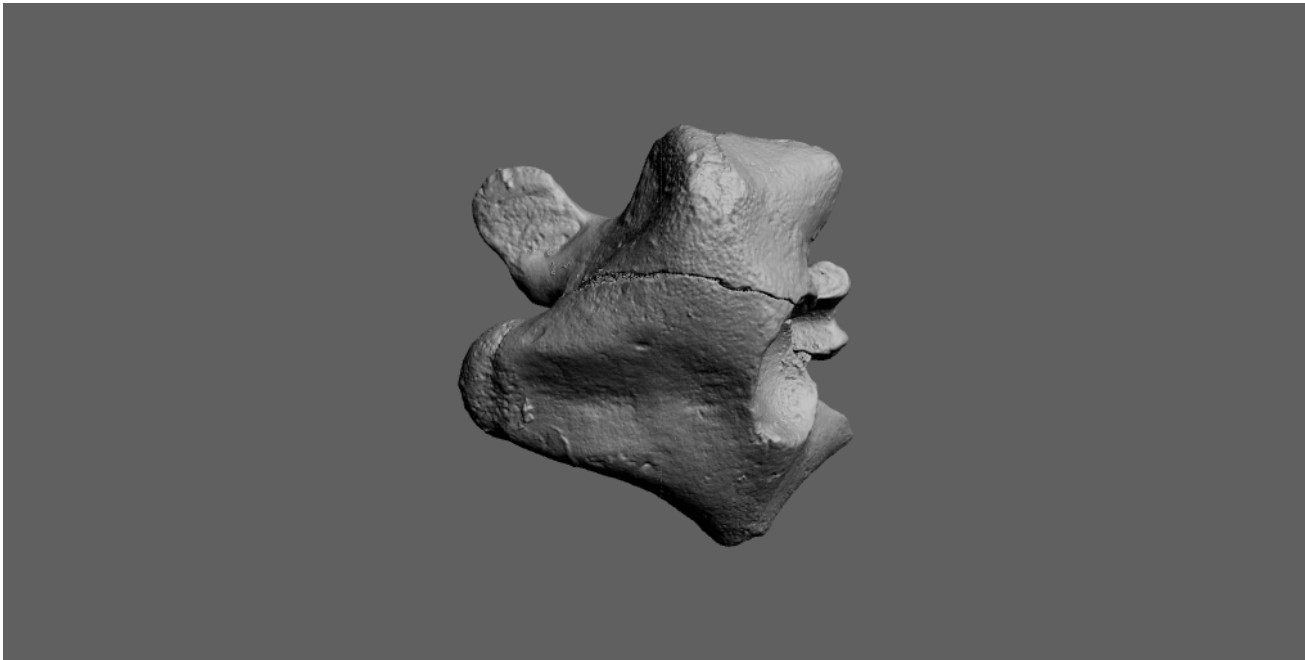

Supplement: s1 [file s1]
